# Supplementary material
Source: HighWire-hosted journal article supplement (https://jnnp.bmj.com/content/91/4/426)
Supplement: inline-supplementary-material-1 [file inline-supplementary-material-1.pdf]

### Quality Assessment Tool for Before-After (Pre-Post) Studies With No Control Group

Article :

| No.                                                     | Criteria                                                                                                                                                                                                                | Yes | No | Other (CD/NR/NA)* |
|---------------------------------------------------------|-------------------------------------------------------------------------------------------------------------------------------------------------------------------------------------------------------------------------|-----|----|-------------------|
| 1.                                                      | Was the study question or objective clearly stated?                                                                                                                                                                     | X   |    |                   |
| 2.                                                      | Were eligibility/selection criteria for the study population prespecified and clearly described?                                                                                                                        | X   |    |                   |
| 3.                                                      | Were the participants in the study representative of those who would be eligible for the test/service/intervention in the general or clinical population of interest?                                                   | X   |    |                   |
| 4.                                                      | Were all eligible participants that met the prespecified entry criteria enrolled?                                                                                                                                       | X   |    |                   |
| 5.                                                      | Was the sample size sufficiently large to provide confidence in the findings?                                                                                                                                           | X   |    |                   |
| 6.                                                      | Was the test/service/intervention clearly described and delivered consistently across the study population?                                                                                                             | X   |    |                   |
| 7.                                                      | Were the outcome measures prespecified, clearly defined, valid, reliable, and assessed consistently across all study participants?                                                                                      | X   |    |                   |
| 8.                                                      | Were the people assessing the outcomes blinded to the participants' exposures/interventions?                                                                                                                            |     |    | X                 |
| 9.                                                      | Was the loss to follow-up after baseline 20% or less? Were those lost to follow-up accounted for in the analysis?                                                                                                       |     |    | X                 |
| 10.                                                     | Did the statistical methods examine changes in outcome measures from before to after the intervention? Were statistical tests done that provided p values for the pre-to-post changes?                                  | X   |    |                   |
| 11.                                                     | Were outcome measures of interest taken multiple times before the intervention and multiple times after the intervention (i.e., did they use an interrupted time-series design)?                                        |     |    | X                 |
| 12.                                                     | If the intervention was conducted at a group level (e.g., a whole hospital, a community, etc.) did the statistical analysis take into account the use of individual-level data to determine effects at the group level? |     | X  |                   |
| <b>Quality Rating (Good, Fair, or Poor): Fair</b>       |                                                                                                                                                                                                                         |     |    |                   |
| <b>Additional Comments (If POOR, please state why):</b> |                                                                                                                                                                                                                         |     |    |                   |
| <b>Rater:</b>                                           |                                                                                                                                                                                                                         |     |    |                   |

\*CD, cannot determine; NA, not applicable; NR, not reported
