# Supplementary material
Source: HighWire-hosted journal article supplement (https://jnnp.bmj.com/content/91/4/426)
Supplement: inline-supplementary-material-3 [file inline-supplementary-material-3.pdf]

## Supplementary Table 2.

## Articles included in different analysis

| Analysis                                                    | Total datasets | Total articles | Total patients | Datasets (articles) with short-term follow-up | Patients with short-term follow-up | Datasets (articles) with long-term follow-up | Patients with long-term follow-up | Mutations                                                                                                                                                                                                                                                                                                                                          |
|-------------------------------------------------------------|----------------|----------------|----------------|-----------------------------------------------|------------------------------------|----------------------------------------------|-----------------------------------|----------------------------------------------------------------------------------------------------------------------------------------------------------------------------------------------------------------------------------------------------------------------------------------------------------------------------------------------------|
| Meta-analysis                                               | 36             | 34             | 311            | 34 (32)                                       | 282                                | 16 (16)                                      | 169                               | DYT- <i>TOR1A</i> (N=31, n=269), DYT- <i>THAP1</i> (N=3, n=16), NBIA/DYT- <i>PANK2</i> (N=2, n=26)                                                                                                                                                                                                                                                 |
| Comparison between <i>TOR1A</i> and other genetic dystonias | 87             | 81             | 432            | 79 (74)                                       | 362                                | 38 (35)                                      | 241                               | DYT- <i>TOR1A</i> (N=42, n=306), DYT/PARK- <i>TAF1</i> (N=8, n=23), DYT- <i>THAP1</i> (N=8, n=24), DYT- <i>SGCE</i> (N=14, n=25), NBIA/DYT- <i>PANK2</i> (N=8, n=40), CHOR/DYT- <i>ADCY5</i> (N=2, n=3), <i>GNAO1</i> (N=3, n=8), <i>ACTB</i> (N=2, n=3)                                                                                           |
| Association between age and disease duration and outcomes   | 70             | 66             | 351            | 64 (60)                                       | 297                                | 27 (26)                                      | 184                               | DYT- <i>TOR1A</i> (N=34, n=243), DYT/PARK- <i>TAF1</i> (N=8, n=23), DYT- <i>THAP1</i> (N=8, n=24), DYT- <i>SGCE</i> (N=12, n=21), NBIA/DYT- <i>PANK2</i> (N=8, n=40)                                                                                                                                                                               |
| Single case analysis                                        | 13             | 7              | 13             | 12 (6)                                        | 12                                 | 7 (4)                                        | 7                                 | DYT- <i>PRKRA</i> (N=1), DYT/PARK- <i>GCH1</i> (N=1), DYT/PARK- <i>GLB1</i> (N=1), CHOR- <i>VPS13A</i> (N=1), DYT- <i>SGCE</i> +DYT- <i>TOR1A</i> (N=1), SCA- <i>ATXN2</i> (N=1), SCA- <i>ATXN3</i> (N=1), DYT/PARK- <i>ATP1A3</i> (N=2), NBIA/DYT- <i>DCAF17</i> (N=1), P <sub>x</sub> MD- <i>SLC2A1</i> (N=1), <i>ATM</i> (N=1), trisomy X (N=1) |

N = number of datasets  
n = number of patients
