# Supplementary material
Source: HighWire-hosted journal article supplement (https://jnnp.bmj.com/content/91/4/426)

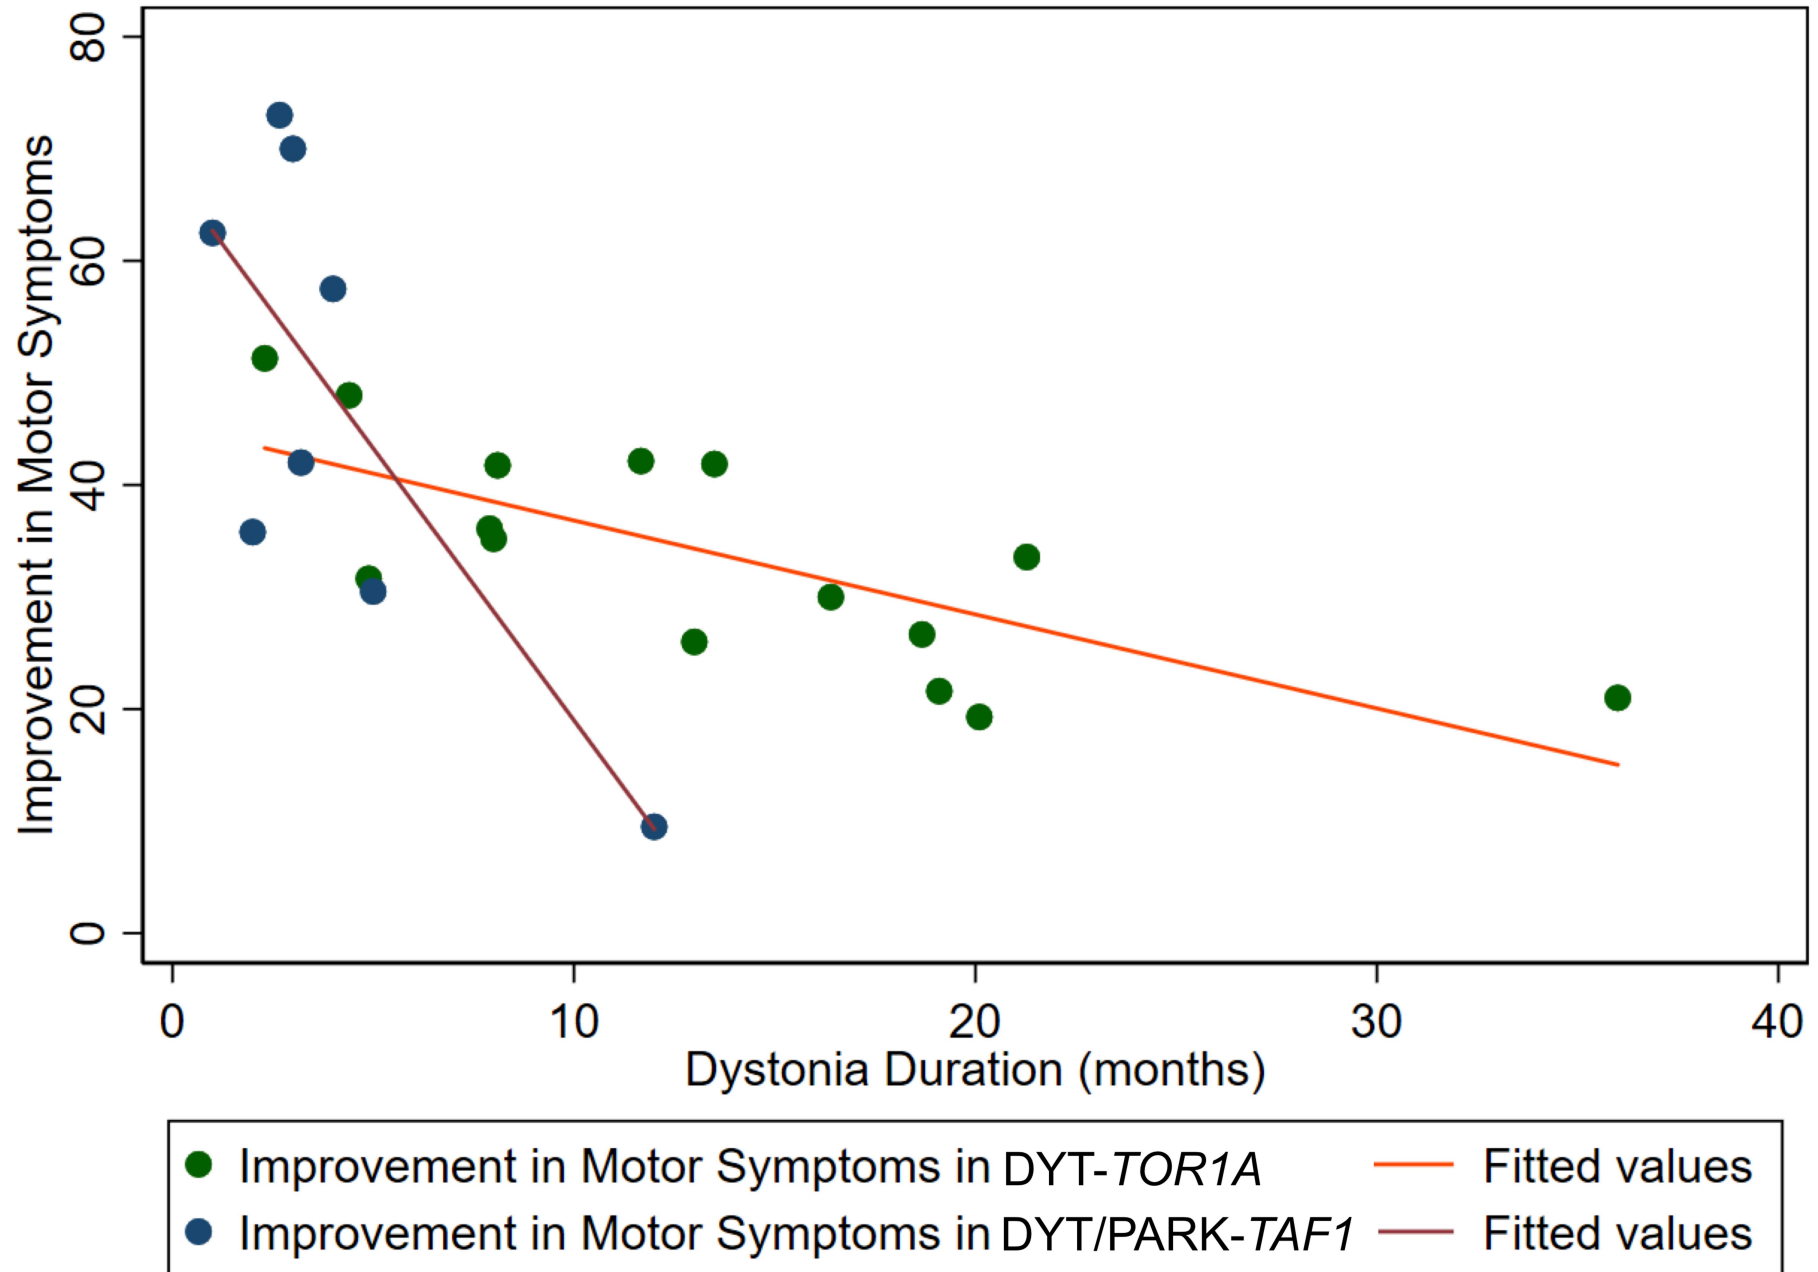

Supplement: inline-supplementary-material-4 [file inline-supplementary-material-4.pdf]
